# Supplementary material for: Soluble Klotho Improves Hepatic Glucose and Lipid Homeostasis in Type 2 Diabetes
Source: PubMed Central journal article supplement — Mol Ther Methods Clin Dev. 2020 Aug 5;18:811–23. doi: 10.1016/j.omtm.2020.08.002 (PMC7479259; doi:10.1016/j.omtm.2020.08.002), 2020-08-05
Supplement: mmc1.pdf [file mmc1.pdf]

**OMTM, Volume 18**

**Supplemental Information**

**Soluble Klotho Improves Hepatic Glucose  
and Lipid Homeostasis in Type 2 Diabetes**

**Huiying Gu, Wei Jiang, Nan You, Xiaobing Huang, Yuming Li, Xuehui Peng, Rui Dong, Zheng Wang, Yinan Zhu, Ke Wu, Jing Li, and Lu Zheng**

# **Supplementary Materials**

## **Materials and Methods**

### **Measurement of fasting glucose, insulin and glucose tolerance tests**

For QUICKI calculation ( $1 / [\log (\text{fasting insulin mU/mL}) + \log (\text{fasting glucose mg/dL})]$ ), fasting plasma glucose and insulin were determined respectively with an Accu-Chek (Performa) and by ELISA (ThermoScientific, EMINS). For GTT, briefly, 1 mg/g body weight of D-(+)-glucose 47829) was administered by intraperitoneal route to mice fasted for 12h. Glycemia was checked blood from tail vein 15 min before glucose injection and then at various times after glucose administration.

### **Measurement of Liver Lipid and Function**

Levels of TG, TC, NEFA, LDL and HDL were measured using corresponding commercial determination kits (F001-1-1 for TG, F002-1-1 for TC, A042-2-1 for NEFA A112-2-1 for HDL A113-2-1 for LDL; Jiancheng, Nanjing, China) with liver tissue or serum samples. Liver function valued by serum levels of ALT and AST was measured using an ADVIA 2400 Chemistry System analyzer (Siemens, Tarrytown, NY) according to the manufacturer's instructions.

### **Co-immunoprecipitation assay**

Co-immunoprecipitation was performed in L02 cells using Pierce™ Co-Immunoprecipitation Kit (Thermo-Fisher Scientific, 26149) according to the manufacturer's protocol. Briefly, immunoprecipitations of IGF1R were performed using an anti-IGF1R antibody overnight at 4 °C. After washing, anti-Klotho antibody was used for western blot analysis.

## Supplementary Tables

**Table S1. Primers for qPCR.**

| Gene                                 | Sequence 5'→3'                                               |
|--------------------------------------|--------------------------------------------------------------|
| human <i>GCK</i>                     | F:GGAGGAAACTGTGACTGAACCTCAA<br>R: AGGCTTCTGAAGTGGAAATATCCAA  |
| human <i>PEPCK</i>                   | F: GTTCAATGCCAGGTTCCCAG<br>R: TTGCAGGGCCAGTTGTTGAC           |
| human <i>PPAR<math>\gamma</math></i> | F: GGGATCAGCTCCGTGGATCT<br>R: TGCAC TTTGGTACTCTTGAAGTT       |
| human <i>SREBP1c</i>                 | F: ACAGTGACTTCCTGGCCTAT<br>R: GCATGGACGGGTACATCTTCAA         |
| human <i>SCD1</i>                    | F: GCCCCTCTACTTGAAGACGA<br>R:AAGTGATCCCATACAGGGCTC           |
| human <i>FASN</i>                    | F: ACAGCGGGGAATGGGTACT<br>R: GACTGGTACAACGAGCGGAT            |
| human <i>Cd36</i>                    | F: AATGCCAGTTGGAGACCTGC<br>R: TCAGCGTCCTGGGTACATT            |
| human <i>FATP1</i>                   | F: AAGGGCATGGACGATCGTCTTTTCT<br>R: CGAAGGCTGCCATGCGGTAGTACCT |
| human <i>CIDEA</i>                   | F: ATTGATGTGGCCCGTGTAACG<br>R: CAGCAGTGCAGATCATAGGAAA        |
| human <i>PPAR<math>\alpha</math></i> | F: ATGGTGGACACGGAAAGCC<br>R: CGATGGATTGCGAAATCTCTTGG         |
| human <i>ACOX1</i>                   | F: TGGCCGCTATGATGGGAATG<br>R: CAGTGACTTCAGGTGCTTGT           |

|                                       |                                                            |
|---------------------------------------|------------------------------------------------------------|
| human <i>CPT1<math>\alpha</math></i>  | F: TCCAGTTGGCTTATCGTGGTG<br>R: CTAACGAGGGGTTCGATCTTGG      |
| human <i><math>\beta</math>-actin</i> | F: CATGTACGTTGCTATCCAGGC<br>R: CTCCTTAATGTCACGCACGAT       |
| mouse <i>GCK</i>                      | F: AGGAAGACCTGAAGAAGGTGATGA<br>R: GTAGGTGGGCAACATCTTTACACT |
| mouse <i>PEPCK</i>                    | F: TGAGGAAGTTCGTGGAAGGCAATG<br>R: TCATATTTCTTCAGCTTGCGGATG |
| mouse <i>PPAR<math>\gamma</math></i>  | F: AAAAAAATCTGACACCTAAGAAAT<br>R: TTGTAAATGTATCTTTATAAACA  |
| mouse <i>SREBP1c</i>                  | F: CACTTCTGGAGACATCGCAAAC<br>R: ATGGTAGACAACAGCCGCATC      |
| mouse <i>SCD1</i>                     | F: TCTTCCTTATCATTGCCAACACCA<br>R: GCGTTGAGCACCAGAGTGTATCG  |
| mouse <i>FASN</i>                     | F: GGAGGTGGTGATAGCCGGTAT<br>R: TGGGTAATCCATAGAGCCCAG       |
| mouse <i>Cd36</i>                     | F: GACTGGGACCATTGGTGATGA<br>R: AAGGCCATCTCTACCATGCC        |
| mouse <i>FATP1</i>                    | F: TCTGTTCTGATTCGTGTTCCG<br>R: CAGCATATAACCACTACTGGCG      |
| mouse <i>CIDEA</i>                    | F: TGTCGTGTTAGCACCCGAG<br>R: TTGCGCTGTTCTGATGGGG           |
| mouse <i>PPAR<math>\alpha</math></i>  | F: TATTCGGCTGAAGCTGGTGTAC<br>R: CTGGCATTGTTCCGGTTCT        |
| mouse <i>ACO1</i>                     | F: GTCTCCGTCATGAATCCCGA<br>R: TGCGATGCCAAATTCCCTCA         |

---

mouse *CPT1 $\alpha$*

F: AGGACCCTGAGGCATCTATT

R: ATGACCTCCTGGCATTCTCC

---

mouse  *$\beta$ -actin*

F: GTGACGTTGACATCCGTAAAGA

R: GCCGGACTCATCGTACTCC

---

**Table S2. Yeast two-hybrid system primers**

| Gene                          | Sequence 5'→3'                                                                                                        |
|-------------------------------|-----------------------------------------------------------------------------------------------------------------------|
| pGBKT7-<br>mouse <i>IGF1R</i> | F: ATGGAGGCCGAATTCCCGGGGATCC<br>ATGAAGTCTGGCTCCGGAGGAGGGT<br>R: GGCCGCTGCAGGTCGACGGATCC<br>TCAGCAGGTCGAGGACTGGGGCAGAG |
| pGADT7-<br>mouse <i>IGF1R</i> | F: CGGGTGGGCATCGATACGGGATCC<br>ATGAAGTCTGGCTCCGGAGGAGGGT<br>R: CTGCAGCTCGAGCTCGATGGATCC<br>TCAGCAGGTCGAGGACTGGGGCAGAG |
| pGADT7-<br>mouse <i>sKL</i>   | F: CGGGTGGGCATCGATACGGGATCC<br>ATGCTAGCCCGCGCCCCTCCTCGCC<br>R: CTGCAGCTCGAGCTCGATGGATCCC<br>AGATAGACATTCGGGTCAGTAAACT |
| pGBKT7-<br>mouse <i>sKL</i>   | F: ATGGAGGCCGAATTCCCGGGGATCC<br>ATGCTAGCCCGCGCCCCTCCTCGCC<br>R: GGCCGCTGCAGGTCGACGGATCC<br>AGATAGACATTCGGGTCAGTAAACT  |

**Table S3. Analysis of the interactions of sKL with IGF1R in yeast**

| No | Strain                                      | Selective agar plates |       |       |         |
|----|---------------------------------------------|-----------------------|-------|-------|---------|
|    |                                             | DDO                   | DDO/A | QDO   | QDO/X/A |
| Q  | Y187(pGADT7- sKL)×<br>Y2HGold(pGBKT7-IGF1R) | White                 | White | White | Blue    |
| Q1 | Y187(pGADT7)×<br>Y2HGold(pGBKT7-IGF1R)      | White                 | No    | No    | No      |
| Q2 | Y187(pGADT7- sKL)×<br>Y2HGold(pGBKT7)       | White                 | No    | No    | No      |
| P  | Y187(pGADT7-IGF1R)×<br>Y2HGold(pGBKT7- sKL) | White                 | White | White | Blue    |
| P1 | Y187(pGADT7)×<br>Y2HGold(pGBKT7- sKL)       | White                 | No    | No    | No      |
| P2 | Y187(pGADT7-IGF1R)×<br>Y2HGold(pGBKT7)      | White                 | No    | No    | No      |
| M  | Y187( pGADT-T)×<br>Y2HGold (pGBKT7-53)      | White                 | White | White | Blue    |
| N  | Y187(pGADT-T)×<br>Y2HGold (pGBKT7-Lam)      | White                 | No    | No    | No      |

DDO (SD/-Leu/-Trp); DDO/A (SD/-Leu/-Trp/AbA); QDO (SD/-Ade/-His/-Leu/-Trp); QDO/x/A (SD/-Ade/-His/-Leu/-Trp/X- $\alpha$ -gal/AbA).
